# Supplementary material
Source: Springer Nature journal article supplement (https://www.springermedizin.de/resource/supplementary/12937_2011_436_MOESM2_ESM.pdf/25653108)

# Food Intake at maximum satiety

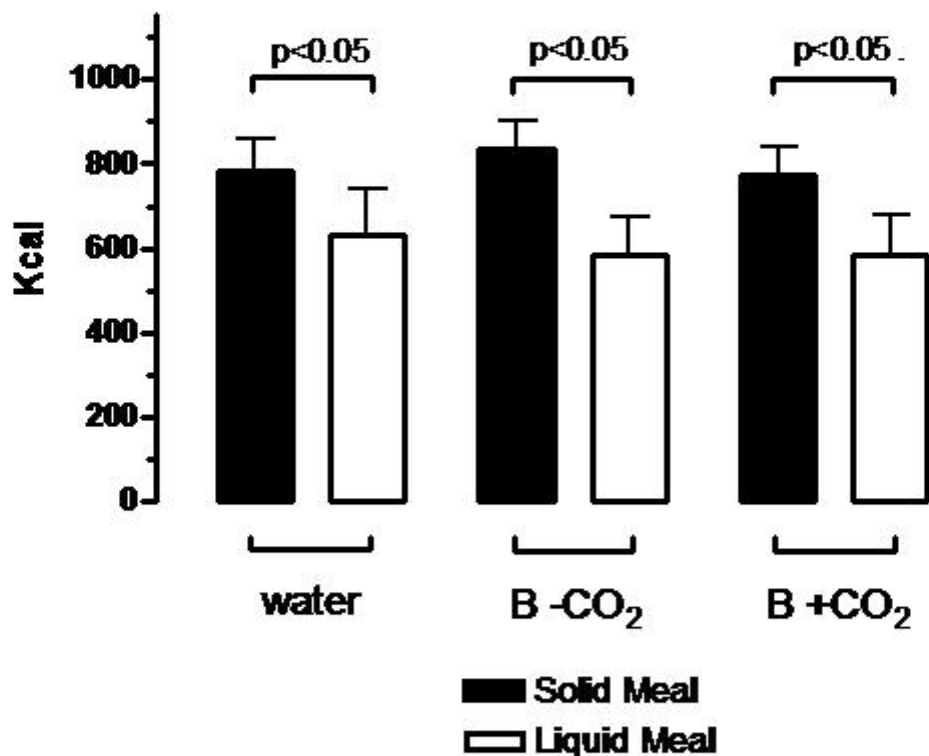

Supplement: MOESM2 [file 25653108]
